# Supplementary material for: Design of a UCA structure with maximum capacity for mmWave LOS MIMO systems
Source: Springer Nature journal article supplement (doi:10.1007/s11432-020-3231-6), 2022-02-10
Supplement: 11432_2020_3231_MOESM1_ESM.pdf [file 11432_2020_3231_MOESM1_ESM.pdf]

• Supplementary File •

## Design of UCA Structure with Maximum Capacity for mmWave LOS MIMO Systems

Jiancun Fan<sup>1\*</sup>, Hongji Liu<sup>1</sup>, Jie Luo<sup>1</sup>, Xinmin Luo<sup>1\*</sup> & Jinbo Zhang<sup>2</sup>

<sup>1</sup>The School of Information and Communications Engineering, Xi'an Jiaotong University, Xi'an 710049, China;

<sup>2</sup>The 54th Research Institute of CETC (CETC-54), Shijiazhuang 050081, China

### Appendix A Derivation of $d'_{m,n}$

From Figure A1,  $d'_{m,n}$  can be formulated as

$$d'_{m,n} = \sqrt{\left(\frac{d_r}{2}\right)^2 + \left(\frac{d_t}{2}\right)^2 + \frac{d_r d_t}{2} \cos \Delta\theta_{m,n}}, \quad (\text{A1})$$

$$\Delta\theta_{m,n} = \theta_{t,n} - \theta_{r,m}, \quad (\text{A2})$$

$$\theta_{t,n} = \theta_{t,0} + \frac{2\pi}{N}n, \quad (\text{A3})$$

$$\theta_{r,m} = \theta_{r,0} + \frac{2\pi}{M}m, \quad (\text{A4})$$

$$\theta_{t,0} = \delta_t, \quad (\text{A5})$$

$$\theta_{r,0} = \delta_r, \quad (\text{A6})$$

where  $\theta_{t,n}$  and  $\theta_{r,m}$  respectively represent the angle between the  $n$ th antenna at the *transmitter* (Tx) and the  $m$ th antenna at the *receiver* (Rx) and the positive x-axis direction, and  $\Delta\theta_{m,n}$  is the angle between  $\theta_{r,m}$  and  $\theta_{t,n}$ .

If we let  $\delta_t = \delta_r = 0$ ,  $d'_{m,n}$  can be expressed as

$$d'_{m,n} = \sqrt{\left(\frac{d_r}{2}\right)^2 + \left(\frac{d_t}{2}\right)^2 + \frac{d_r d_t}{2} \cos\left(\frac{2\pi n}{N} - \frac{2\pi m}{M}\right)}, \quad (\text{A7})$$

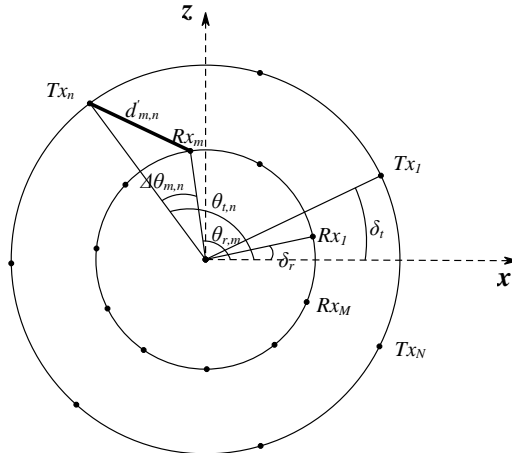

**Figure A1** Antenna spacing of UCA after panning

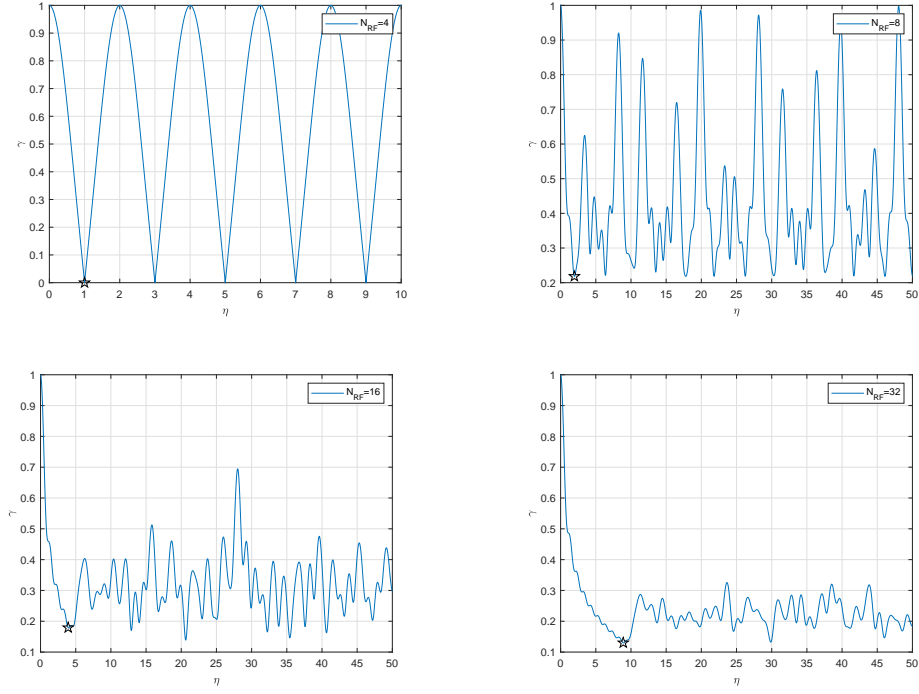

**Figure B1** The curve of  $\gamma$  versus  $\eta$

### Appendix B Simulation proof of the relationship between $\gamma$ and $\eta$

In order to test this hypothesis, we conduct a simulation, and the results are shown in Figure B1. We set the carrier frequency to 75GHz, the distance  $L$  between the Tx and the Rx to be 100m. The four graphs in Figure B1 are simulation results under the different conditions, i.e., the number of *radio frequency* (RF) chains is 4, 8, 16 and 32. The simulation results show that  $\gamma$  has a trend of decreasing first and then fluctuating, and we choose the pentagon in the Figure B1, as the approximate optimal solution of  $\eta$ , denoted by  $\eta^{opt}$ .

The approximate optimal solution has the following two advantages.

- If this pentagon is moved to the left, the average correlation coefficient will increase, thereby reducing the channel capacity.
- If this pentagon moves to the right, there is not necessarily a value with a smaller average correlation coefficient. Even if there is a value with a smaller average correlation coefficient, the diameter will increase a lot, thereby increasing the size of the *uniform circular array* (UCA).

### Appendix C Statistical results of $\eta^{opt}$

We draw the curve of  $\gamma$  versus  $\eta$  and obtain  $\eta^{opt}$  when  $N_{RF}$  is equal to 2, 4, ..., 64. The statistical results are shown in Table C1. Fit the data in Table C1, and the result of the linear fitting is shown in Figure C1.

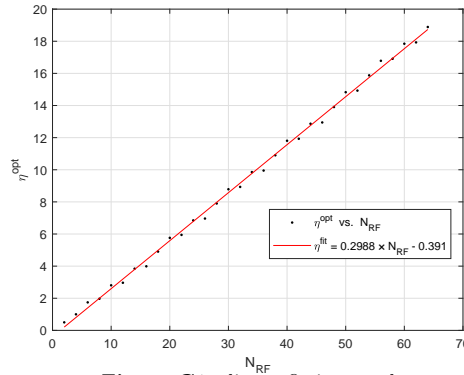

**Figure C1** linear fitting result

\* Corresponding author (email: fanjc0114@gmail.com, luoxm@mail.xjtu.edu.cn)

**Table C1** Correspondence between  $\eta^{opt}$  and  $N_{RF}$ 

| $N_{RF}$ | $\eta^{opt}$ | $N_{RF}$ | $\eta^{opt}$ | $N_{RF}$ | $\eta^{opt}$ |
|----------|--------------|----------|--------------|----------|--------------|
| 2        | 0.5          | 24       | 6.8482       | 46       | 12.9448      |
| 4        | 1            | 26       | 6.9626       | 48       | 13.9044      |
| 6        | 1.7437       | 28       | 7.9004       | 50       | 14.8270      |
| 8        | 1.9696       | 30       | 8.7854       | 52       | 14.9282      |
| 10       | 2.8060       | 32       | 8.9322       | 54       | 15.8769      |
| 12       | 2.9655       | 34       | 9.8544       | 56       | 16.7834      |
| 14       | 3.8423       | 36       | 9.9506       | 58       | 16.9091      |
| 16       | 3.9889       | 38       | 10.9002      | 60       | 17.8461      |
| 18       | 4.9050       | 40       | 11.8055      | 62       | 17.9286      |
| 20       | 5.7607       | 42       | 11.9289      | 64       | 18.8873      |
| 22       | 5.9450       | 44       | 12.8654      |          |              |

## Appendix D Proof of the linear relationship between $\eta^{opt}$ and $N_{RF}$

Because when  $\eta = \eta^{opt}$ , the sub-channel correlation is the approximately minimum. Therefore, exploring the simplified algorithm to solve  $\eta^{opt}$  should also be based on the expression of sub-channel correlation, which is (D1).

$$\mathbf{h}_{n_1}^H \mathbf{h}_{n_2} = \sum_{m=1}^M \cos\left(\pi\eta \sin\frac{(n_2-n_1)\pi}{N} \sin\left(\frac{2\pi m}{M} - \frac{(n_1+n_2)\pi}{N}\right)\right), \quad (\text{D1})$$

Each cumulative term in (D1) has the similar form

$$\cos\left(\pi\eta \sin\frac{(n-1)\pi}{N_{RF}} \sin\frac{(2m-n-1)\pi}{N_{RF}}\right). \quad (\text{D2})$$

And we can get the first zero point of each cumulative term

$$\eta(n, m, N_{RF}) = \frac{1}{2 \sin\frac{(n-1)\pi}{N_{RF}} \sin\frac{(2m-n-1)\pi}{N_{RF}}}. \quad (\text{D3})$$

Due to  $m \in [1, N_{RF}]$ ,  $\sin\frac{(2m-n-1)\pi}{N_{RF}}$  is a variable with a value from 0 to 1. We can replace it with a random variable  $\beta_m$ . The probability distribution function of  $\beta_m$  is

$$f_r(\beta_m) = \begin{cases} \frac{2}{\pi\sqrt{1-\beta_m^2}} & 0 < \beta_m < 1 \\ 0 & \text{others} \end{cases}. \quad (\text{D4})$$

Therefore,  $\eta^{opt}$  can be expressed as

$$\begin{aligned} \eta^{opt} &= \frac{1}{2 \sin\frac{\pi}{N_{RF}} \sin\frac{(2m-3)\pi}{N_{RF}}} + \Delta \\ &= \frac{1}{2 \sin\frac{\pi}{N_{RF}} \beta_m} + \Delta = \frac{N_{RF}}{2\pi\beta_m} + \Delta. \end{aligned} \quad (\text{D5})$$

From (D5),  $\eta^{opt}$  will increase as  $N_{RF}$  increases. Especially when  $N_{RF}$  is large,  $\eta^{opt}$  and  $N_{RF}$  are roughly linear.

## Appendix E Simulation details

In this part, we provide some simulation details for Figure 1(a)(b)(c) in the letter. For the *spectral efficiency* (SE) of the Rayleigh fading channel, we generate the channel matrix 1000 times to calculate the average of their SE by (E1). Figure 1(a) shows the curve of SE versus *Signal to noise ratio* (SNR).

$$\mathcal{R}(\mathbf{H}) = \mathbb{E}\left(\log_2\left(\left|\mathbf{I}_{N_{RF}} + \frac{\rho}{\sigma^2 N_{RF}} \mathbf{H}^H \mathbf{H}\right|\right)\right). \quad (\text{E1})$$

In the *line-of-sight* (LOS) environment, we can ignore the multipath effect, so the simulation conditions will be simple. We adopt a  $8 \times 8$  baseband system, apply *quadrature phase shift keying* (QPSK) modulation, and utilize the *minimum mean square error* (MMSE) criterion for decoding at the Rx. We use the *multiple input multiple output* (MIMO) transmission scheme of space division multiplexing. Each RF chain transmits  $10^6$  bits of data and counts the *bit error rate* (BER) under different SNR. The simulation result is shown in Figure 1(b).

We first calculate the singular values of  $\mathbf{H}^H \mathbf{H}$  and sort them in ascending order, then normalize their accumulated value, and finally draw the *cumulative distribution function* (CDF) as shown in Figure 1(c).
